# Supplementary material
Source: PubMed Central journal article supplement (PMC3542216)
Supplement: auto-9-33-s01.pdf [file auto-9-33-s01.pdf]

## Supplemental Material to:

Oliver Voigt and Stefanie Pöggeler

Autophagy genes *Smatg8* and *Smatg4* are required 1  
for fruiting-body 2 development, vegetative growth  
and ascospore germination in the filamentous 3  
ascomycete *Sordaria macrospora*

Autophagy 2013; 9(1)

<http://dx.doi.org/10.4161/auto.22398>

[www.landesbioscience.com/journals/autophagy/article/22398](http://www.landesbioscience.com/journals/autophagy/article/22398)

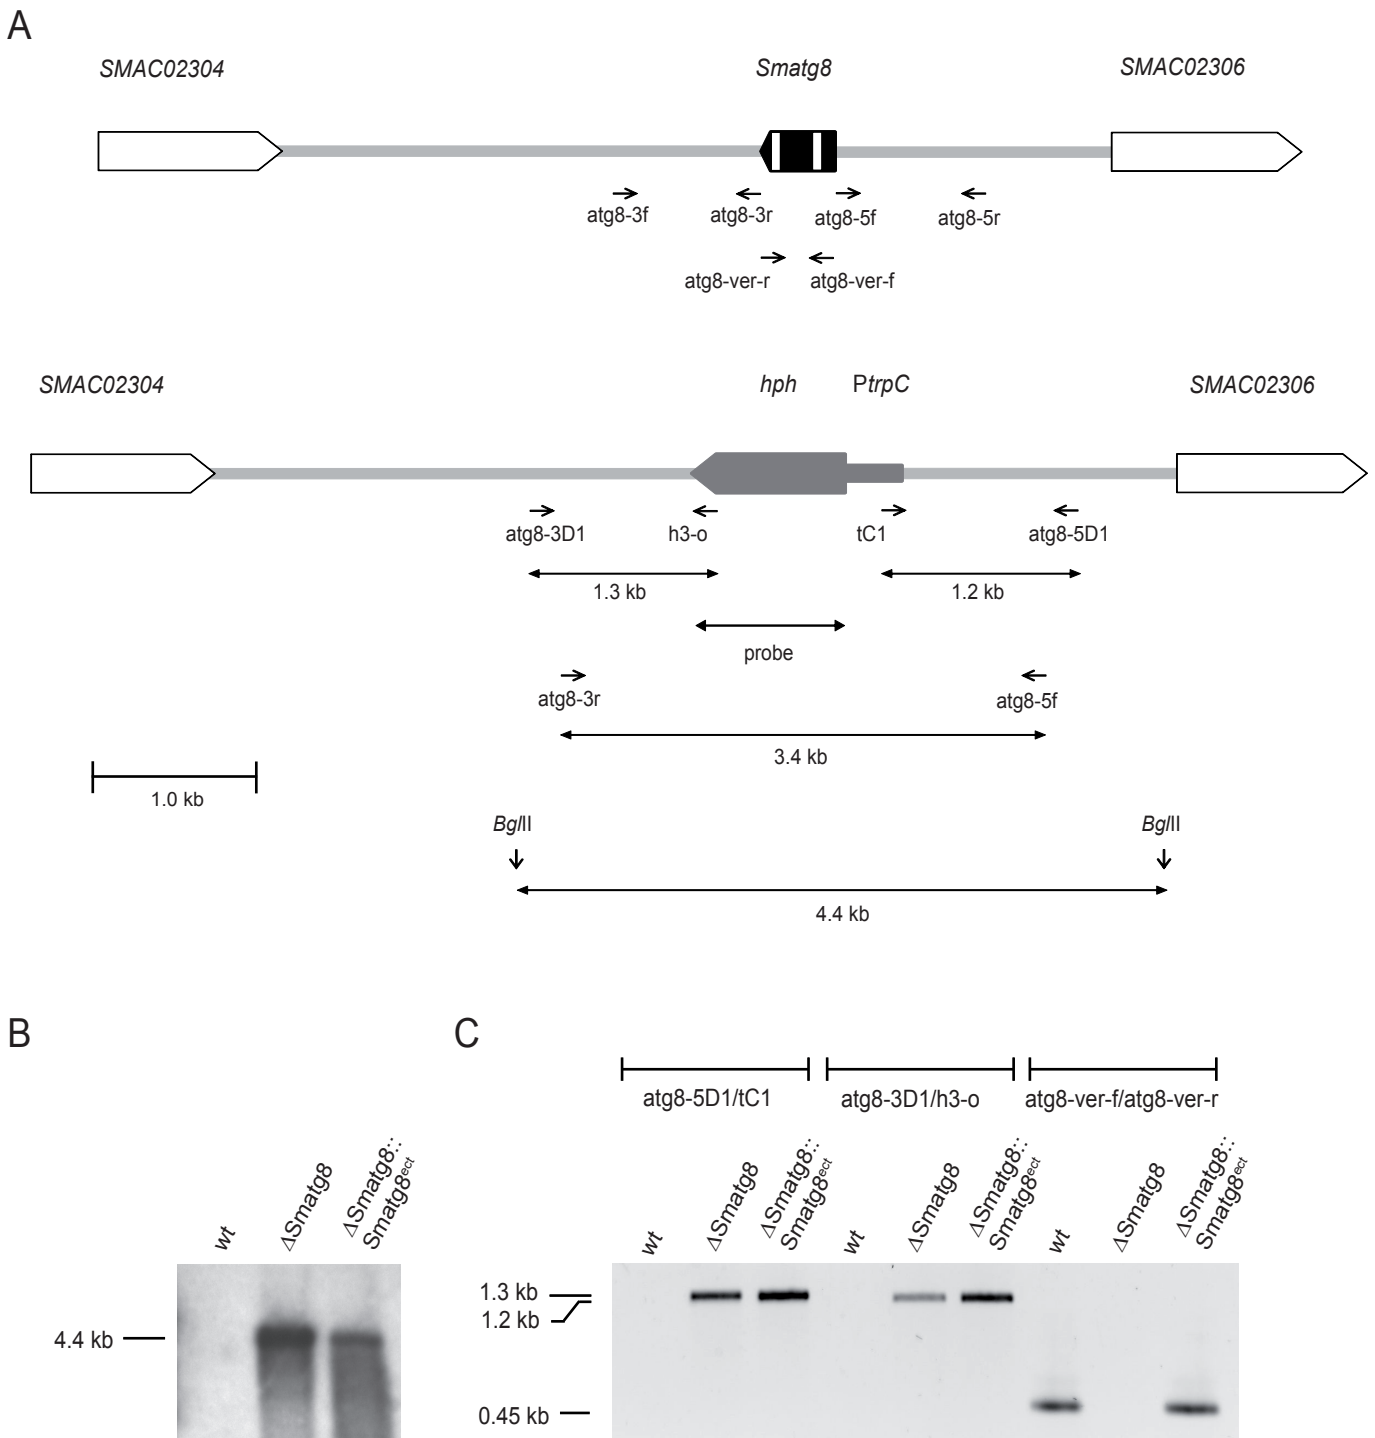

**Figure S1.** Generation and complementation of a  $\Delta$ *Smatg8* strain. (A) Schematic illustration of the *Smatg8* locus before and after homologous integration of the deletion cassette, primer position used for the verification of the deletion and complementation are indicated by small arrows. Sizes of PCR fragments and fragments obtained after restriction enzyme cleavage are given. Position and size of the probe used for southern hybridization is indicated. (B) Southern hybridization (Sambrook et al., 2001) demonstrating the successful integration of the deletion cassette using an *hph* gene specific probe. The gDNA of wt and  $\Delta$ *Smatg8* and complementation strain  $\Delta$ *Smatg8*::*Smatg8* was digested with *Bgl*II and hybridized with the *hph*-gene specific probe. An expected signal of 4400 bp was detected in the deletion and the complemented strain. (C) Deletion and complementation was confirmed by PCR.

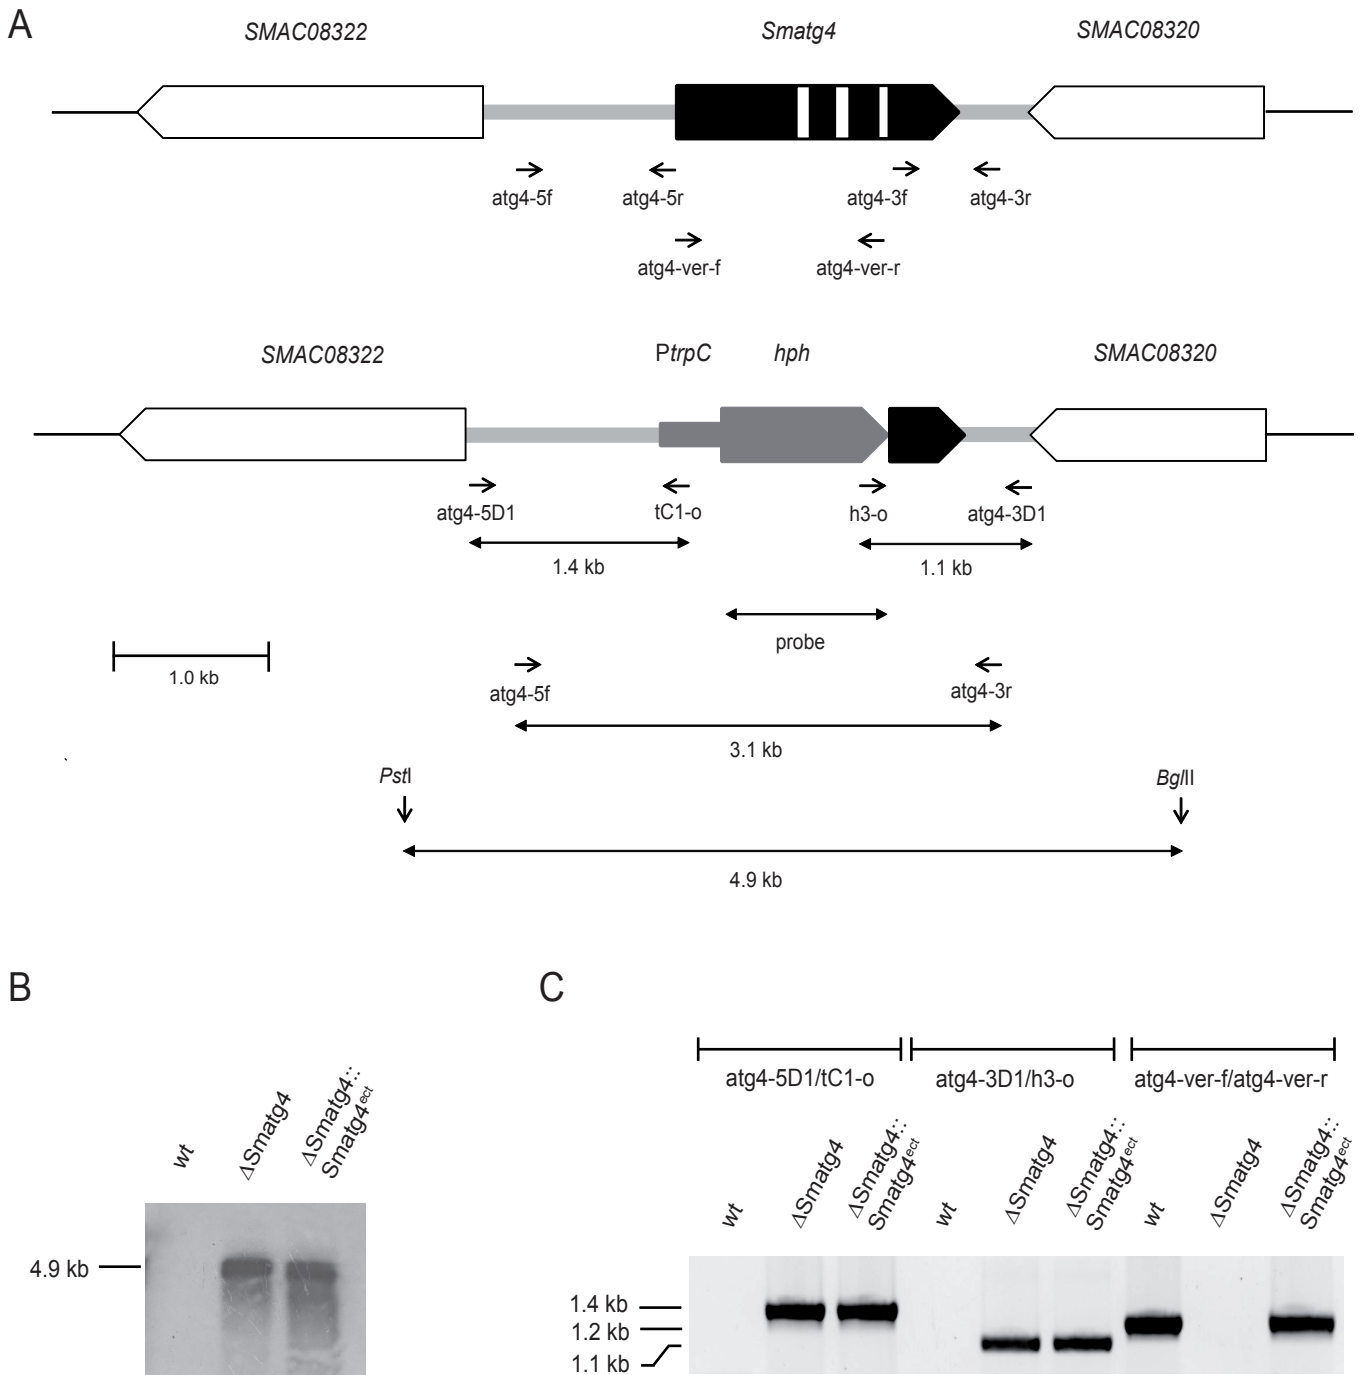

**Figure S2.** Construction of a *Smatg4* deletion strain. (A) Schematic illustration of the *Smatg4* locus before and after gene replacement. Positions of primers for deletion and complementation analysis are indicated by small arrows. Sizes of PCR fragments and fragments obtained after restriction enzyme cleavage are given. Position and size of the probe used for Southern hybridization is indicated. (B) Southern hybridization with a *hph* probe to verify single copy integration of the *Smatg4* deletion cassette. The gDNA of wt,  $\Delta$ *Smatg4* and the complemented strain  $\Delta$ *Smatg4*::*Smatg4* was digested with *Pst*I and *Bgl*II and hybridized with the *hph*-gene specific probe. An expected signal of 4900 bp was detected in the deletion and the complemented strain. (C) Deletion and complementation was confirmed by PCR.

**Table S1**  
**Plasmids used during this study**

| Plasmid              | Features/Inserts                                                                                                                       | Source                           |
|----------------------|----------------------------------------------------------------------------------------------------------------------------------------|----------------------------------|
| pRS246               | <i>URA3</i>                                                                                                                            | Christianson et al. (1992)       |
| pRSnat               | <i>URA3</i> , <i>nat</i> -cassette                                                                                                     | Klix et al. (2010)               |
| pDS23-eGFP           | <i>egfp</i> under control of <i>gpd</i> promoter and <i>trpC</i> terminator of <i>A. nidulans</i> , <i>URA3</i> , <i>nat</i> -cassette | Nowrousian unpublished           |
| p1783                | <i>egfp</i> under control of <i>gpd</i> promoter and <i>trpC</i> terminator of <i>A. nidulans</i> , <i>hph</i> -cassette               | Pöggeler et al. (2003)           |
| pRS426- <i>met25</i> | <i>met25</i> promoter, <i>URA3</i> , <i>amp</i> <sup>R</sup>                                                                           | Mumberg et al., 1994             |
| pGBKT7               | <i>TRP1</i> , <i>GAL4-BD</i> , <i>kan</i> <sup>R</sup>                                                                                 | Clontech                         |
| pGADT7               | <i>LEU2</i> , <i>GAL4-AD</i> , <i>amp</i> <sup>R</sup>                                                                                 | Clontech                         |
| pRSmet-Smatg8        | <i>Smatg8</i> under control of <i>met25</i> promoter, <i>URA3</i> , <i>amp</i> <sup>R</sup> ,                                          | This work                        |
| pRSmet-Smatg4        | <i>Smatg4</i> under control of <i>met25</i> promoter, <i>URA3</i> , <i>amp</i> <sup>R</sup> ,                                          | This work                        |
| pRS315-EGFP-Atg8     | <i>LEU2</i> , <i>amp</i> <sup>R</sup> , <i>egfp-atg8</i> under control of endogenous promoter                                          | M. Thumm, Göttingen <sup>a</sup> |
| pRS316-Atg4          | <i>URA3</i> , <i>amp</i> <sup>R</sup> , <i>atg4</i> under control of endogenous promoter                                               | M. Thumm, Göttingen <sup>a</sup> |
| pBD-Smatg8           | <i>TRP1</i> , <i>GAL4-BD</i> , <i>kan</i> <sup>R</sup> , <i>Smatg8</i>                                                                 | This work                        |
| pBD-Smatg4           | <i>TRP1</i> , <i>GAL4-BD</i> , <i>kan</i> <sup>R</sup> , <i>Smatg4</i>                                                                 | This work                        |
| pAD-Smatg8           | <i>LEU2</i> , <i>GAL4-AD</i> , <i>amp</i> <sup>R</sup> , <i>Smatg8</i>                                                                 | This work                        |
| pAD-Smatg4           | <i>LEU2</i> , <i>GAL4-AD</i> , <i>amp</i> <sup>R</sup> , <i>Smatg4</i>                                                                 | This work                        |
| pAD-RAN-Bpm          | <i>LEU2</i> , <i>GAL4-AD</i> , <i>amp</i> <sup>R</sup> , <i>RanBPM</i>                                                                 | Tucker et al. (2009)             |
| pDsRed-SKL           | <i>DsRed-SKL</i> under control of <i>gpd</i> promoter and <i>trpC</i> terminator of <i>A. nidulans</i> , in pRHN1                      | Elleuche and Pöggeler (2008)     |
| pRS-Δ <i>Smatg8</i>  | 1023 bp of the 5' flanking region and 1021 bp of 3' flanking region of <i>Smatg8</i> interrupted by the <i>hph</i> -cassette in pRSnat | This work                        |
| pRS-Δ <i>Smatg4</i>  | 1031 bp of 5' flanking region and 468 bp of 3' region plus 214 bp flanking region of <i>Smatg4</i> disrupted by the <i>hph</i> -       | This work                        |

|                                 |                                                                                                                                                                                                                                                                                                    |           |
|---------------------------------|----------------------------------------------------------------------------------------------------------------------------------------------------------------------------------------------------------------------------------------------------------------------------------------------------|-----------|
|                                 | cassette in pRSnat                                                                                                                                                                                                                                                                                 |           |
| pRS-Smatg8-comp                 | <i>Smatg8</i> plus 1023 bp of 5' and 1021 bp of 3' flanking region in pRSnat                                                                                                                                                                                                                       | This work |
| pRS-Smatg4-comp                 | <i>Smatg4</i> plus 1031 bp of 5' and 214 bp of 3' flanking region in pRSnat                                                                                                                                                                                                                        | This work |
| pRS-egfp-Smatg8                 | 1023 bp of the 5' flanking region of <i>Smatg8</i> , <i>egfp</i> excluding stop codon, <i>Smatg8</i> without start codon and 1021 bp of 3' flanking region of <i>Smatg8</i> in pRSnat                                                                                                              | This work |
| pRS-Smatg8-egfp                 | <i>Smatg8</i> excluding stop codon in pDS23-eGFP                                                                                                                                                                                                                                                   | This work |
| pRS-egfp-Smatg8mut              | <i>Smatg8</i> excluding stop codon in pDS23-eGFP, AA 115-118 substituted with alanine                                                                                                                                                                                                              | This work |
| pRS-Smatg4-egfp                 | <i>Smatg4</i> excluding stop codon in pDS23-eGFP                                                                                                                                                                                                                                                   | This work |
| pRS-egfp-Smatg8 <sup>G116</sup> | <i>Smatg8</i> C-terminally truncated (AA 1-116) in pDS23-eGFP                                                                                                                                                                                                                                      | This work |
| pRS-egfp-Smatg8-DsRedSKL        | 1023 bp of the 5' flanking region of <i>Smatg8</i> , <i>egfp</i> excluding stop codon, <i>Smatg8</i> without start codon and 1021 bp of 3' flanking region of <i>Smatg8</i> and <i>DsRed-SKL</i> under control of <i>gpd</i> promoter and <i>trpC</i> terminator of <i>A. nidulans</i> , in pRSnat | This work |

**Table S2**  
**Primers applied in this study**

| Oligo name   | Specific sequence (5'-3') <sup>b</sup>                 |
|--------------|--------------------------------------------------------|
| atg8-5f      | GTAACGCCAGGGTTTTCCAGTCACGACGGACGACTTCAC<br>AGTGACATC   |
| atg8-5r      | CAAAAAATGCTCCTTCAATATCAGTTAACGATCTCATTTTG<br>GCGGTTTG  |
| atg8-3f      | GAGTAGATGCCGACCGGGAACCAGTTAACGATTTTCGAGAC<br>TGCGTAATC |
| atg8-3r      | GCGGATAACAATTTACACAGGAAACAGCGACGCAGCCCT<br>TTGTTTCCC   |
| atg4-5f      | GTAACGCCAGGGTTTTCCAGTCACGACGATATCGTTTGCC<br>GCTTGGTC   |
| atg4-5r      | CAAAAAATGCTCCTTCAATATCAGTTAACGAATCTCTTGAA<br>TGCCCAGA  |
| atg4-3f      | GAGTAGATGCCGACCGGGAACCAGTTAACAGGTATAGCCG<br>GGTGAGTCC  |
| atg4-3r      | GCGGATAACAATTTACACAGGAAACAGCAGAGTCCTTTG<br>TTCTATCAT   |
| atg8-5D1     | CGAACGGAGAAGGCGGACAC                                   |
| atg8-3D1     | CAGTTGCGATACATTACAAC                                   |
| atg8-ver-f   | CAAGTTTAAGGACGAGCACCCCTTC                              |
| atg8-ver-r   | GAAGGTGTTCTCGCCCGAGTATGTG                              |
| atg4-5D1     | CTGCATGAAAGGTAAAGAGG                                   |
| atg4-3D1     | CTCTGGCTGACAATATTTCC                                   |
| atg4-ver-f   | ATGACGTCCTCGCGACCTGGTGGCAC                             |
| atg4-ver-r   | ATCGACTGAGGTAAGTGTAGAGTTG                              |
| Atg8-cf      | <i>ACTAGTATGAGATCCAAGTTTAAGGA</i>                      |
| Atg8-cr      | <i>GTCGACTTACGCAGTCTCGAAAT</i>                         |
| atg4-cf      | <i>ACTAGTATGACGTCCTCGCGACCTGG</i>                      |
| atg4-cr      | <i>GTCGACTTATGCTCCTAGAGCGGTTT</i>                      |
| atg8-RT-f    | GGCCAGTTCGTTTACGTCAT                                   |
| atg8-RT-r    | GTGTTCTCGCCCGAGTATGT                                   |
| atg4-RT-f    | GTCTTTGGCGTACGAAGAGC                                   |
| atg4-RT-r    | GTTTGGCGAGAAGGCTTTGAC                                  |
| atg8-Hf      | <i>CATATGAGATCCAAGTTTAAGGACGA</i>                      |
| atg8-Hr      | <i>GAATTCGCTTACGCAGTCTCGAAATCGC</i>                    |
| atg4-Hf3     | <i>GAATTC<sup>3</sup>CCCATGACGTCCTCGCGACCTGG</i>       |
| atg4-Hr3     | <i>CTCGAGGGTTATGCTCCTAGAGCGGTTT</i>                    |
| atg4-Hr      | <i>GTCGACGCTTATGCTCCTAGAGCGGTTT</i>                    |
| atg8-egfp-5r | GTGAACAGCTCCTCGCCCTTGCTCACCATTTGGCGGTTTG<br>CTTTGATG   |
| atg8-egfp-3f | TCACTCTCGGCATGGACGAGCTGTACAAGAGATCCAAGTT<br>TAAGGACGA  |
| atg8-egfp-3r | GCGGATAACAATTTACACAGGAAACAGCGTGTACTACCT<br>ATCATGTAT   |
| atg8-gf      | <i>GCGAGATCTATGAGATCCAAGTTTAAGGAC</i>                  |
| atg8-gr      | <i>CGCAAGCTTCGCAGTCTCGAAATCGCCGA</i>                   |
| atg8-gr2     | <i>CGCAAGCTTCGCAGTCTCGGCGGCGGCGGCGGTGTTCTCGC</i>       |

|              |                                                                |
|--------------|----------------------------------------------------------------|
|              | CCGAGTAT                                                       |
| atg4-gf      | <i>GCGCCATGGCCACGTCCTCGCGACCTGGTGG</i>                         |
| atg4-gr      | <i>CGCCCATGGCTGCTCCTAGAGCGGTTTCTC</i>                          |
| atg8pegfp-5r | GCCGAAGGTGTTCTCGCCCG                                           |
| atg8pegfp-3f | TCACATACTCGGGCGAGAACACCTTCGGCT<br>AATCCATATCCTCTCTACC          |
| atg8-5f3     | GTAACGCCAGGGTTTTCCAGTCACGACGTTTATGTTGTAA<br>TAGACGGG           |
| atg8-org-5r2 | GTGTACTACCTATCATGTATTTCTA                                      |
| atg8-org-3f  | <u>AGCTTAGAAATACATGATAGGTAGTACAC</u> CGTACAGTGACC<br>GGTGACTCT |
| MiPe-r2      | <u>GCGGATAACAATTTCACACAGGAAACAGCTCGAGTGGAGA</u><br>TGTGGAGTG   |
| hph-f        | GTAACTGATATTGAAGGAGCATTTTTTGG                                  |
| hph-r        | GTAACTGGTTCCCGGTCGGCATCTACTC                                   |
| tC1          | CACCGCCTGGACGACTAAACC                                          |
| tc1-o        | CCTGGACGACTAAACCAAAA                                           |
| h3-o         | GATGGCTGTGTAGAAGTACT                                           |
| egfp-f       | ATGGTGAGCAAGGGCGAGGAGCTGTTAC                                   |
| egfp-r       | CTTGTACAGCTCGTCCATGCCGAGAGTGA                                  |
| ssu-f        | ATCCAAGGAAGGCAGCAGGC                                           |
| ssu-r        | TGGAGCTGGAATTACCGCG                                            |

<sup>a</sup>, Department of Biochemistry II, Georg-August University Göttingen, Germany

<sup>b</sup>, Underlined sequences represent 29 bp overhangs for homologous recombination in *S.cerevisiae* and letters in italics indicate generation of restriction sites.
